# Supplementary material
Source: Springer Nature journal article supplement (https://www.springermedizin.de/resource/supplementary/12891_2012_1384_MOESM2_ESM.pdf/9508332)
Supplement: MOESM2 [file 9508332]

461 Physician-Reported Cases

5 cases  
confirmed on  
source  
documents as  
Not a  
Malignancy

43 cases with  
insufficient data  
to adjudicate as  
even a possible  
Malignancy

6 cases noted on  
AE form to be  
prior  
to CORRONA  
enrollment

3 cases  
submitted  
twice

404 Definite, Possible  
or Probable Malignancies

234

Definite

69

Probable

101

Possible
